# Supplementary material
Source: ML conference proceedings conference paper supplement (https://aclanthology.org/2020.alw-1.19)
Supplement: OptionalSupplementaryMaterial [file hs_asianPrejudice_top1000hashtags_annotated_annotator3.xlsx]

## Sheet: antiChinaHashtags_annotation
	Hashtag	Asian_relevant	Asian_entity [free text]	Stance_towards_Asian_entity	Corona_relevant	Stance_towards_Corona	Comments
	#wuhanvirus	yes	Wuhan	neutral	yes	Neutral
	#wuhan	yes	Wuhan	neutral	no
	#wuhancoronavirus	yes	wuhan	neutral	yes	neutral
	#coronavirus	no			yes	Neutral
	#covid19	no			yes	Neutral
	#china	yes	China	Neutral	no
	#chinavirus	yes	China	Negative	yes	neutral
	#chinacoronavirus	yes	China	Neutral	yes	neutral
	#covid	no			yes	neutral
	#ccp	no			yes	neutral
	#covid2019	no			yes	neutral
	#coronavirusoutbreak	no			yes	neutral
	#covid_19	no			yes	neutral
	#chinesevirus	yes	china	Negative	yes	neutral
	#chinesecoronavirus	yes	china	Negative	yes	neutral
	#coronaviruspandemic	no			yes	negative
	#ccpchina	yes	china	Neutral	yes	neutral
	#coronaoutbreak	no			yes	neutral
	#who	no			no
	#italy	no			no
	#chinese	yes	china	Neutral	no
	#pandemic	no			yes	neutral
	#wuhancoronavius	yes	wuhan	neutral	yes	neutral
	#corona	no			yes	neutral
	#coronavirusupdate	no			yes	neutral
	#virus	no			yes	neutral
	#trump	no			no
	#chinazi	yes	china	Very Negative	no
	#wuhancoronavirusoutbreak	yes	Wuhan	neutral	yes	negative
	#xijinping	yes	china	neutral	no
	#usa	no			no
	#hongkong	yes	hong kong	neutral	no
	#fakenews	no			no
	#wuhanflu	yes	wuhan	Negative	yes	neutral
	#coronavirusupdates	no			yes	neutral
	#wuflu	yes	wuhan	Negative	yes	Neutral
	#sarscov2	no			no
	#wuhanpneumonia	yes	wuhan	Neutral	yes	neutral
	#iran	no			no
	#ccp_is_terrorist	yes	communist party china	Very Negative	no
	#coronaviruschina	yes	China	neutral	yes	neutral
	#coronapocalypse	no			yes	Very Negative
	#boycottchina	yes	China	Very Negative	no
	#wuhanoutbreak	yes	wuhan	Neutral	yes	Neutral
	#maga	no			no
	#hubei	yes	hubei province	Neutral	no
	#trump2020	no			no
	#chinalies	yes	China	Very Negative	no
	#china_is_terrorist	yes	China	very Negative	no
	#breaking	no			no
	#sars	no			no
	#us	no			no
	#democrats	no			no
	#kungflu	yes	kung fu - chinese sport	very Negative	yes	Neutral
	#2019ncov	no			yes	neutral
	#taiwan	yes	taiwan - east asian state	Neutral	no
	#ccpvirus	yes	communist party china	Negative	yes	neutral
	#outbreak	no			yes	neutral
	#cdc	no			no
	#kag	no			no
	#msm	no			no
	#coronavirususa	no			yes	neutral
	#chinaflu	yes	china	Negative	yes	neutral
	#india	no			no
	#coronaalert	no			yes	neutral
	#antichinazi	yes	china	very Negative	no
	#coronapocolypse	no			yes	very Negative
	#health	no			no
	#fakenewsmedia	no			no
	#quarantine	no			no
	#coronavid19	no			yes	neutral
	#epidemic	no			yes	neutral
	#ncov2019	no			yes	neutral
	#standwithhongkong	yes	hong kong	Very Positive	no
	#covid19china	yes	china	Neutral	yes	neutral
	#marketcrash	no			no
	#coronavirusindia	no			yes	neutral
	#cnn	no			no
	#wuhancoronovirus	yes	wuhan	Neutral	yes	neutral
	#communist	yes	chinese political affiliation	neutral	no
	#southkorea	yes	south korea	neutral	no
	#beijing	yes	beijing	neutral	no
	#uk	no			no
	#news	no			no
	#tds	no			no
	#japan	yes	japan	Neutral	no
	#bioweapon	no			yes	very Negative
	#wuhansars	yes	wuhan	Negative	no
	#america	no			no
	#lockdown	no			no
	#kag2020	no			no
	#5g	no			no
	#qanon	no			no
	#chinaisasshoe	yes	China	Very Negative	no
	#europe	no			no
	#hk	yes	hong kong	Neutral	no
	#madeinchina	yes	China	Very Negative	no
	#hongkongers	yes	hong kong	Negative	no
	#canada	no			no
	#flu	no			yes	neutral
	#economy	no			no
	#enemyofthepeople	no			no
	#fuckchina	yes	china	very Negative	no
	#racist	no			no
	#carrielam	yes	CE of HK	Neutral	no
	#washyourhands	no			yes	neutral
	#americafirst	no			no
	#covd19	no			yes	neutral
	#trumpvirus	no			yes	Negative
	#coronavirusinindia	no			yes	neutral
	#potus	no			no
	#ebola	no			no
	#covid19india	no			yes	neutral
	#nationalemergency	no			no
	#coronavirusuk	no			yes	neutral
	#coronvirus	no			yes	neutral
	#foxnews	no			no
	#quarantinelife	no			yes	neutral
	#socialdistancing	no			yes	neutral
	#deepstate	no			no
	#stockmarket	no			no
	#boycottmulan	yes	Mulan - disney film set in China	Very Negative	no
	#spain	no			no
	#media	no			no
	#breakingnews	no			no
	#c	no			no
	#hongkongprotests	yes	HK protests	Neutral	no
	#cdnpoli	no			no
	#chineseflu	yes	China	Negative	yes	neutral
	#france	no			no
	#politics	no			no
	#panicbuying	no			yes	Negative
	#canceleverything	no			no
	#viruscorona	no			yes	neutral
	#communistchina	yes	China	Neutral	no
	#shanghai	yes	shangahi	Neutral	no
	#covid19us	no			yes	neutral
	#wuhanchina	yes	wuhan	Neutral	no
	#election2020	no			no
	#covid19uk	no			yes	neutral
	#italycoronavirus	no			yes	neutral
	#wuh	yes	wuhan	Neutral	no
	#covid19usa	no			yes	neutral
	#eu	no			no
	#foreignvirus	no			yes	Negative
	#healthcare	no			yes	neutral
	#chinawuhanvirus	yes	wuhan	Neutral	yes	neutral
	#co	no			no
	#coronaviruschallenge	no			yes	neutral
	#pakistan	no			no
	#australia	no			no
	#chinazivirus	yes	china	Negative	yes	neutral
	#flattenthecurve	no			yes	neutral
	#ncov	no			yes	neutral
	#tcot	no			no
	#thankschina	yes	china	Negative	no
	#wwg1wga	no			no
	#toiletpaper	no			no
	#asia	no			no
	#xivirus	yes	chinese political affiliation	Very Negative	yes	neutral
	#dems	no			no
	#liwenliang	yes	chinese doctor	Neutral	yes	neutral	doctor who warned about covid 19
	#spanishflu	no			no
	#xi	yes	chinese political affiliation	Neutral	no
	#covid2019uk	no			yes	neutral
	#biden	no			no
	#racism	no			no
	#russia	no			no
	#travel	no			no
	#wuha	yes	wuhan	Neutral	no
	#hkers	yes	hong kong	Neutral	no
	#coronaviruscanada	no			yes	neutral
	#covidindia	no			yes	neutral
	#hkpolicebrutality	yes	hong kong police	Very Negative	no
	#world	no			no
	#coronavirustruth	no			yes	Negative
	#blamechina	yes	China	very Negative	no
	#disobedientdss	no			no
	#panic	no			no
	#propaganda	no			no
	#w	no			no
	#worldpowers	no			no
	#coronavirusaustralia	no			yes	neutral
	#hkgov	yes	hong kong	Neutral	no
	#hkpoliceterrorists	yes	hong kong police	Very Negative	no
	#covid19italia	no			yes	neutral
	#h1n1	no			no
	#italylockdown	no			yes	neutral
	#wu	yes	wuhan	Neutral	no
	#climatesecurity	no			no
	#wuhandiary	yes	wuhan	Neutral	no
	#americans	no			no
	#donaldtrump	no			no
	#liberalismisamentaldisorder	no			no
	#publichealth	no			yes	neutral
	#toiletpaperapocalypse	no			yes	negative
	#swineflu	no			no
	#nerotrump	no			no
	#nba	no			no
	#obama	no			no
	#truth	no			no
	#hospital	no			yes	neutral
	#seattle	no			no
	#stayhome	no			yes	neutral
	#coronavirussa	no			yes	neutral
	#unsc	no			no
	#novelcoronavirus	no			yes	neutral
	#singapore	yes	singapore	neutral	no
	#buildthewall	no			no
	#chinawuhan	yes	wuhan	neutral	no
	#covid2020	no			yes	neutral
	#quarantineandchill	no			yes	neutral
	#thailand	no			no
	#coronavirusitaly	no			yes	neutral
	#coronavirusseattle	no			yes	neutral
	#chinapneumonia	yes	China	negative	yes	neutral
	#cpacvirus	no			yes	neutral
	#unitedstates	no			no
	#disease	no			yes	neutral
	#germany	no			no
	#ncp	no			no
	#stayhomechallenge	no			yes	neutral
	#1	no			no
	#anticcp	yes	chinese political affiliation	negative	no
	#codvid19	no			yes	neutral
	#freetibet	yes	tibet	Positive	no
	#canceleverythingnow	no			yes	negative
	#auspol	no			no
	#mers	no			no
	#freehk	yes	hong kong	positive	no
	#joebiden	no			no
	#american	no			no
	#convid19	no			yes	neutral
	#fightforfreedom	no			no
	#nz	no			no
	#government	no			no
	#standwithhk	yes	hong kong	positive	no
	#un	no			no
	#brexit	no			no
	#maga2020	no			no
	#coronoavirus	no			yes	neutral
	#twitter	no			no
	#biologicalwarfare	no			yes	Very Negative
	#chinesewuhanvirus	yes	China	negative	yes	Neutral
	#freedomofspeech	no			no
	#london	no			no
	#travelban	no			yes	neutral
	#medical	no			yes	neutral
	#nyc	no			no
	#pneumonia	no			yes	neutral
	#toiletpaperpanic	no			yes	negative
	#trumpderangementsyndrome	no			no
	#wuhanlockdown	yes	wuhan	neutral	yes	neutral
	#coronafighters	no			yes	positive
	#democrat	no			no
	#nhs	no			yes	neutral
	#coronaindia	no			yes	neutral
	#coronapandemic	no			yes	neutral
	#msnbc	no			no
	#trump2020landslide	no			no
	#trumpdemic	no			no
	#business	no			no
	#censorship	no			no
	#hkpolice	yes	hong kong police	neutral	no
	#nhpolitics	no			no
	#tomhanks	no			yes	neutral
	#tucker	no			no
	#uyghurs	no			no
	#walkaway	no			no
	#wethepeople	no			no
	#chinashouldapologize	yes	China	negative	no
	#korea	yes	korea	neutral	no
	#newyork	no			no
	#tibet	yes	tibet	neutral	no
	#adrenochrome	no			no
	#bitcoin	no			no
	#climatechange	no			no
	#covid_2019	no			yes	neutral
	#masks	no			yes	neutral
	#ncov19	no			yes	neutral
	#prc	no			no
	#wars	no			no
	#coro	no			yes	neutral
	#democracy	no			no
	#makechinapay	yes	china	very Negative	no
	#xijingping	yes	chinese political affiliation	neutral	no
	#africa	no			yes	neutral
	#coronavirusinsa	no			yes	neutral
	#coronovirus	no			no
	#humanrights	no			no
	#oilprice	no			no
	#staythefhome	no			yes	negative
	#highriskcovid19	no			yes	Neutral
	#hiv	no			no
	#pandemia	no			yes	neutral
	#cor	no			no
	#policebrutality	no			no
	#stocks	no			no
	#vaccine	no			yes	neutral
	#wuhanvi	yes	wuhan	neutral	yes	neutral
	#fakenewscnn	no			no
	#presidenttrump	no			no
	#tuesdaythoughts	no			no
	#coronachina	no			no
	#coronarvirues	no			yes	neutral
	#fridaythe13th	no			no
	#hkpolicestate	yes	hong kong police	neutral	no
	#stpatricksday	no			no
	#tuesdaymotivation	no			no
	#california	no			no
	#communism	yes	chinese political affiliation	neutral	no
	#communismkills	yes	chinese political affiliation	very Negative	no
	#coronarvirus	no			yes	neutral
	#covidcount	no			yes	neutral
	#fearmongering	no			yes	negative
	#gop	no			no
	#huoshenshan	yes	hospital in wuhan	neutral	yes	neutral
	#kungflufighting	yes	Chinese sport	Neutral	yes	negative
	#milan	no			no
	#republicans	no			no
	#facts	no			no
	#imnotchina	yes	china	negative	no
	#mask	yes	chinese cultural practice	Neutral	yes	neutral
	#mulan	yes	chinese film	neutral	no
	#wallstreet	no			no
	#bioweapons	no			yes	very negative
	#blackmonday	no			no
	#fridaythoughts	no			no
	#hoax	no			no
	#infections	no			yes	neutral
	#liberals	no			no
	#trudeaumustgo	no			no
	#xinjiang	yes	chinese political affiliation	neutral	no
	#coronavi	no			yes	neutral
	#fakehysteria	no			yes	negative
	#lombardy	no			no
	#mondaythoughts	no			no
	#q	no			no
	#tuesdaymorning	no			no
	#wakeupamerica	no			no
	#chinesepneumonia	yes	china	negative	yes	neutral
	#communists	yes	chinese political affiliation	neutral	no
	#cornoravirus	no			yes	Neutral
	#crownvirus	no			yes	neutral
	#diamondprincess	no			no
	#factsmatter	no			no
	#southafrica	no			no
	#coronavir	no			yes	neutral
	#covid_19uk	no			yes	neutral
	#covid19fr	no			yes	neutral
	#foxandfriends	no			no
	#freehongkong	yes	hong kong	positive	no
	#indomethacin	no			no
	#naturevsmoney	no			no
	#2a	no			no
	#coron	no			yes	neutral
	#coronavirusitalia	no			yes	neutral
	#event201	no			no
	#facemask	yes	chinese cultural practice	neutral	yes	neutral
	#fiddle	no			no
	#taiwancanhelp	yes	taiwan	positive	no
	#trump2020nowmorethanever	no			no
	#trumpcrash	no			no
	#trumpplague	no			yes	negative
	#whuanvirus	yes	wuhan	neutral	yes	neutral
	#youtube	no			no
	#5demandsnot1less	no			no
	#bidenscognitivedecline	no			no
	#ch	yes	china	Neutral	no
	#chi	yes	china	Neutral	no
	#chinesecommunistparty	yes	chinese political affiliation	Neutral	no
	#contagion	no			yes	neutral
	#demdebate	no			no
	#hysteria	no			no
	#indiafightscorona	no			yes	negative
	#israel	no			no
	#kag2020landslidevictory	no			no
	#mikepompeo	no			no
	#rule1	no			no
	#soros	no			no
	#worldhealthorganization	no			no
	#wuhancovid19	yes	wuhan	neutral	yes	neutral
	#xijinpingvirus	yes	chinese political affiliation	neutral	yes	neutral
	#bangladesh	no			no
	#britain	no			no
	#claims	no			no
	#coronav	no			yes	neutral
	#dowjones	no			no
	#impeachment	no			no
	#stateofemergency	no			no
	#turkey	no			no
	#uyghur	no			no
	#tedros	no			no
	#warroompandemic	no			no
	#billgates	no			no
	#coronavirusnyc	no			yes	neutral
	#covid19canada	no			yes	neutral
	#democratsaredestroyingamerica	no			no
	#europetravelban	no			yes	neutral
	#huawei	yes	chinese company	neutral	no
	#italia	no			no
	#martiallaw	no			no
	#s	no			no
	#sars_cov_2	no			no
	#trade	no			no
	#wuhancorona	yes	wuhan	neutral	yes	neutral
	#wuhanvir	yes	wuhan	neutral	yes	neutral
	#ad	no			no
	#chinapropaganda	yes	china	neutral	no
	#coronavirusus	no			yes	neutral
	#hannity	no			no
	#pelosi	no			no
	#staysafe	no			yes	Neutral
	#trump2020landslidevictory	no			no
	#usarmy	no			no
	#wuhanv	yes	wuhan	Neutral	yes	neutral
	#xenophobia	no			no
	#ai	no			no
	#coronavius	no			yes	neutral
	#democratsaredangerous	no			no	neutral
	#doctors	no			yes	neutral
	#hospitals	no			yes	neutral
	#karmavirus	no			yes	negative
	#military	no			no
	#nothingcanstopwhatiscoming	no			no
	#panicshopping	no			yes	negative
	#recession	no			no
	#wohan	yes	wuhan	neutral	no
	#wuhanmediavirus	yes	wuhan	neutral	yes	neutral
	#abortion	no			no
	#anywherebutchina	yes	china	very Negative	no
	#caronavirusoutbreak	no			yes	neutral
	#dowfutures	no			no
	#drliwenliang	yes	chinese doctor	neutral	yes	neutral
	#hongkongpolice	yes	hong kong police	neutral	no
	#leftists	no			no
	#marchmadness	no			no
	#namaste	no			no
	#sarcov2	no			no
	#soshk	no			no
	#apple	no			no
	#biowarfare	no			yes	very negative
	#caronavirus	no			yes	neutral
	#coronavirusinpakistan	no			yes	neutral
	#coronaviruswuhan	yes	wuhan	neutral	yes	neutral
	#coverup	no			no
	#donothingdemocrats	no			no
	#hollywood	no			no
	#infection	no			yes	neutral
	#irancoronavirus	no			yes	neutral
	#liberal	no			no
	#lives	no			no
	#medicine	no			yes	neutral
	#nationaldayofprayer	no			no
	#people	no			no
	#pjnet	no			no
	#rule2	no			no
	#wuhanviru	yes	wuhan	neutral	yes	neutral
	#batsoup	yes	chinese eating practices	negative	yes	negative
	#hkgovt	yes	hong kong	neutral	no
	#influenza	no			yes	Neutral
	#kerala	no			no
	#losangeles	no			no
	#nancypelosi	no			no
	#ncov2020	no			yes	neutral
	#stayathome	no			yes	neutral
	#texas	no			no
	#washington	no			no
	#wetmarkets	no			no
	#winnietheflu	no			yes	negative
	#berniesanders	no			no
	#cancel2020	no			no
	#coronarevolution	no			yes	neutral
	#coronavirusaus	no			yes	neutral
	#covi	no			yes	neutral
	#covid19outbreak	no			yes	neutral
	#iblamechina	yes	china	negative	no
	#patriots	no			no
	#policestate	no			no
	#socialismkills	no			no
	#supplychain	no			no
	#survival	no			no
	#trumpaddress	no			no
	#wtf	no			no
	#chicago	no			no
	#congress	no			no
	#conspiracy	no			no
	#coronavirues	no			yes	neutral
	#covidcanada	no			yes	neutral
	#death	no			no
	#drtedros	no			no
	#fangcang	yes	chinese hospital	neutral	yes	neutral
	#genocide	no			no
	#globalists	no			no
	#orangemanbad	no			no
	#socialist	no			no
	#thelead	no			no
	#trumprecession	no			no
	#virology	no			no
	#wildlife	no			no
	#chinesecommunistpartyvirus	yes	chinese political affiliation	negative	yes	negative
	#coronavirusflorida	no			yes	neutral
	#cpac	no			no
	#fear	no			no
	#harvard	no			no
	#hongkonger	yes	hong kong	negative	no
	#italian	no			no
	#potus45	no			no
	#rule3	no			no
	#russian	no			no
	#saarc	no			no
	#science	no			no
	#stockmarketcrash2020	no			no
	#sundaythoughts	no			no
	#tehran	no			no
	#volunteers	no			no
	#wakeup	no			no
	#whitehouse	no			no
	#wuhancor	yes	wuhan	neutral	yes	neutral
	#yunnan	yes	chinese province	neutral	no
	#chin	yes	china	neutral	no
	#coronavirusdeath	no			yes	negative
	#coronaviruspakistan	no			yes	neutral
	#delhi	no			no
	#djia	no			no
	#especially	no			no
	#fed	no			no
	#globalization	no			no
	#hkpf	yes	hong kong	neutral	no
	#mondaymorning	no			no
	#pelosipandemic	no			yes	negative
	#saturdaythoughts	no			no
	#socialmedia	no			no
	#stopthepanic	no			no
	#thursdaythoughts	no			no
	#trumppressconference	no			no
	#virusoutbreak	no			yes	neutral
	#woke	no			no
	#wuhanchinavirus	yes	wuhan	Neutral	yes	neutral
	#wuhanco	yes	wuhan	neutral	yes	neutral
	#bernie	no			no	neutral
	#chenqiushi	yes	chinese lawyer	neutral	yes	neutral
	#conspiracytheory	no			no
	#coronavirusreachesdelhi	no			yes	neutral
	#cov	no			yes	neutral
	#covid19ke	no			yes	neutral
	#cronavirus	no			yes	neutral
	#deaths	no			yes	neutral
	#everydayhero	no			no	neutral
	#fighting	no			no	neutral
	#fluu	no			yes	neutral
	#globalist	no			no
	#gold	no			no
	#liuyifei	yes	chinese actress	neutral	no
	#mondaymotivaton	no			no
	#northkorea	no			no
	#nwo	no			no
	#openborders	no			no
	#socialdistancingnow	no			yes	Neutral
	#thefive	no			no
	#worldwide	no			no
	#wuhan400	yes	Wuhan	Neutral	no
	#2	no			no
	#ccot	no			no
	#chicoms	yes	chinese political affiliation	Neutral	no
	#chinaisasshole	yes	china	Very Negative	no
	#democratshateamerica	no			no
	#emergency	no			no
	#freedom	no			no
	#hkprotesters	yes	hong kong	neutral	no
	#humanity	no			no
	#ireland	no			no
	#money	no			no
	#oil	no			no
	#pandemics	no			no
	#president	no			no
	#schengen	no			no
	#socialdistance	no			yes	Neutral
	#theeyesofdarkness	no			yes	Neutral	Book said to predict covid 19
	#virus_corona	no			yes	neutral
	#wuhanvirus2020	yes	Wuhan	neutral	yes	neutral
	#abc_challenge	no			no
	#amazon	no			no
	#ccpcoronavirus	yes	chinese political affiliation	negative	yes	neutral
	#chicom	yes	chinese political affiliation	Neutral	no
	#covid_19ph	no			yes	neutral
	#crypto	no			no
	#deankoontz	no			yes	Neutral	Author of book said to predict covid 19
	#democraticdebate	no			no
	#dnc	no			no
	#globalism	no			no
	#herdimmunity	no			yes	neutral
	#indian	no			no
	#markets	no			no
	#nifty	no			no
	#socialism	no			no
	#tech	no			no
	#technology	no			no
	#wuhanjiayou	yes	wuhan	Very Positive	no		chinese term used to provide support to a person
	#wuhanlabs	yes	wuhan	neutral	no
	#yellowperil	no			no
	#aids	no			no
	#bats	no			yes	Neutral
	#bcpoli	no			no
	#btc	no			no
	#chine	yes	china	Very Negative	no		slur for a chinese woman
	#corinavirus	no			yes	neutral
	#covid19australia	no			yes	neutral
	#dementiajoe	no			no
	#demexit	no			no
	#fangbin	no			no
	#grandprincess	no			no
	#healthy	no			no
	#hkpoliceterrorism	yes	hong kong police	Very Negative	no
	#music	no			no
	#nigeria	no			no
	#standwithwuhan	yes	wuhan	Positive	no
	#testkits	no			yes	neutral
	#trudeau	no			no
	#trumpspeech	no			no
	#winning	no			no
	#wuhanc	yes	Wuhan	neutral	no
	#xenophobic	no			no
	#biologicalweapon	no			yes	very negative
	#borisjohnson	no			no
	#chinesegovernment	yes	chinese political affiliation	neutral	no
	#coronauk	no			yes	neutral
	#coronaviru	no			yes	neutral
	#coronavirusitalla	no			yes	neutral
	#costco	no			no
	#covid19aus	no			yes	neutral
	#covid19france	no			yes	neutral
	#doctor	no			yes	neutral
	#fact	no			no
	#globalpandemic	no			yes	neutral
	#hongkongisnotchina	yes	hong kong/china	Negative	no
	#hypocrites	no			no
	#infected	no			no
	#italians	no			no
	#love	no			no
	#malaysia	no			no
	#mexico	no			no
	#philippines	no			no
	#preppers	no			no
	#prevention	no			no
	#qom	no			no
	#quarantined	no			yes	Neutral
	#shaheenbagh	no			no
	#stockmarketcrash	no			no
	#uae	no			no
	#ukraine	no			no
	#2019	no			no
	#boston	no			no
	#covid19sa	no			yes	neutral
	#facebook	no			no
	#google	no			no
	#impeachmenthoax	no			no
	#internationalwomensday	no			no
	#iranian	no			no
	#lionelnation	no			no
	#livetonighttv	no			no
	#mainstreammedia	no			no
	#movies	no			no
	#patientzero	no			yes	neutral
	#quote	no			no
	#research	no			no
	#selfquarantine	no			yes	neutral
	#toiletpapercrisis	no			yes	Negative
	#weirdo	no			no
	#whistleblower	no			no
	#workfromhome	no			yes	Neutral
	#yuge	no			no
	#25thamendment	no			no
	#biodefense	no			yes	negative
	#biological	no			yes	neutral
	#cats	no			no
	#chicomvirus	yes	chinese political affiliation	negative	yes	neutral
	#concentrationcamps	no			no
	#coronawirus	no			yes	Negative
	#covid19pandemic	no			yes	neutral
	#cybersecurity	no			no
	#disinfection	no			yes	neutral
	#dogs	no			no
	#facemasks	yes	chinese cultural practice	neutral	yes	neutral
	#food	no			no
	#gettrump	no			no
	#help	no			no
	#hkairport	yes	hong kong	neutral	no
	#hkprotests	yes	hong kong	neutral	no
	#hubeiprovince	yes	hubei province	neutral	no
	#investing	no			no
	#maharashtra	no			no
	#nasdaq	no			no
	#pc	no			no
	#pla	no			no
	#protection	no			no
	#saudiarabia	no			no
	#spanish	no			no
	#sydney	no			no
	#trumppence2020	no			no
	#universalsuffrage	no			no
	#workingfromhome	no			yes	neutral
	#wuhancoron	yes	wuhan	neutral	yes	neutral
	#zhaolijian	yes	chinese political affiliation	neutral	no
	#asiancontagion	yes	asia	negative	yes	neutral
	#beltandroad	no			no
	#chinacoverup	no			no
	#commonsense	no			no
	#corruption	no			no
	#covid1	no			yes	neutral
	#data	no			no
	#democratstheenemywithin	no			no
	#entertainment	no			no
	#epidemiology	no			yes	Neutral
	#europeanunion	No			no
	#factsnotfear	no			no
	#globalhealth	no			yes	neutral
	#handsanitizer	no			yes	Neutral
	#italystaystrong	no			no
	#japanese	yes	japan	neutral	no
	#lizehua	Yes			no
	#msmistheenemyofthepeople	no			no
	#nbasuspended	No			no
	#newjersey	no			no
	#pets	no			no
	#redchina	yes	chinese political affiliation	neutral	no
	#shame	no			no
	#staystrongwuhankids	yes	wuhan	Very Positive	no
	#unitedkingdom	no			no
	#vigilance	no			no
	#viruses	no			yes	neutral
	#voteredtosaveamerica	no			no
	#war	no			no
	#wearafuckingmask	yes	chinese cultural practice	positive	yes	neutral
	#wetmarket	no			no
	#blackswan	no			no
	#borderobserver	no			no
	#breaking_news	no			no
	#breakofdawn	no			no
	#canadian	no			no
	#chinacorona	yes	china	neutral	yes	neutral
	#civil	no			no
	#coronarivus	no			Yes	Neutral
	#coronavirusiran	no			Yes	Neutral
	#coronavirusnederland	no			yes	neutral
	#coronavirussouthafrica	no			yes	neutral
	#coronvirusuk	no			yes	neutral
	#covid19au	no			yes	neutral
	#covid19italy	no			yes	neutral
	#dontpanic	no			no
	#dow	no			no
	#featured	no			no
	#florida	no			no
	#fridayfeeling	no			no
	#fridaymotivation	no			no
	#funny	no			no
	#global	no			no
	#hongkongprotesters	yes	hong kong	neutral	no
	#iblameccp	yes	chinese political affiliation	negative	no
	#idiots	no			no
	#illegalaliens	no			no
	#karma	no			no
	#karonamaste	yes	chinese cultural practice	negative	yes	neutral
	#kiwi	no			no
	#life	No			no
	#limpopo	no			no
	#manufacturing	no			no
	#mondaymotivation	no			no
	#n95mask	no			yes	neutral
	#newyorkcity	no			no
	#nih	no			no
	#ohio	no			no
	#pandemic_2020	no			yes	neutral
	#sars2	no			no
	#selfisolating	no			yes	neutral
	#startups	no			no
	#stfu	no			no
	#toronto	no			no
	#tradewar	no			no
	#viral	no			no
	#wuhancoronavir	yes	wuhan	neutral	yes	neutral
	#wuhancoronaviru	yes	wuhan	neutral	yes	neutral
	#wuhanpnemonia	yes	wuhan	Negative	yes	neutral
	#wuhanquarantine	yes	wuhan	neutral	yes	neutral
	#4moreyears	no			no
	#animals	no			no
	#ccppropaganda	yes	chinese political affiliation	Negative	no
	#children	no			no
	#chinaliedpeopledied	yes	china	Very Negative	yes	negative
	#chinamustpay	yes	china	Very Negative	no
	#chinasfault	yes	china	Very Negative	no
	#coronavirusfacts	no			yes	Neutral
	#culture	no			no
	#decouple	no			no
	#democraticparty	no			no
	#dollar	no			no
	#donttrustchina	yes	china	Very Negative	no
	#draintheswamp	no			no
	#fauci	no			yes	neutral	immunologist - member of White House Coronavirus Task Force
	#ff	no			no
	#ffs	no			no
	#forex	no			no
	#georgesoros	no			no
	#germanmeasles	no			no
	#hanyang	no			no
	#hypocrisy	no			no
	#libertarians	no			no
	#libtards	no			no
	#lies	no			no
	#loservirus	no			yes	negative
	#ncovid19	no			yes	neutral
	#neverforget	no			no
	#nurses	no			yes	neutral
	#nyse	no			no
	#polokwane	No			no
	#populationcontrol	no			no
	#realdonaldtrump	no			no
	#rt	no			no
	#safety	no			no
	#sanfrancisco	no			no
	#stayhomesavelives	no			yes	neutral
	#staythefuckhome	no			yes	negative
	#testing	no			yes	neutral
	#trending	no			no
	#trudeaunotfitforoffice	no			no
	#u	no			no
	#uighurs	no			no
	#unitednations	no			no
	#wahunvirus	yes	wuhan	neutral	yes	neutral
	#walkawayfromdemocrats	no			no
	#wechat	no			no
	#whatilearnedtoday	no			no
	#airlines	no			no
	#army	no			no
	#asian	yes	asia	neutral	no
	#birdflu	no			no
	#bloomberg	no			no
	#british	no			no
	#cash	no			no
	#chinasucks	yes	China	Negative	no
	#chongqing	yes	china	neutral	no
	#conronavirus	no			yes	Neutral
	#cornavirusoutbreak	no			yes	neutral
	#coronachan	no			yes	negative
	#cpacpatientzero	no			yes	neutral
	#cpc	yes	chinese political affiliation	neutral	no
	#democratsareadisgrace	no			no
	#diseasex	no			yes	neutral
	#egypt	no			no
	#fakecrisis	no			no
	#globalwarming	no			no
	#god	no			no
	#godblessamerica	no			no
	#hongkongpoliceterrorists	yes	hong kong police	neutral	no
	#hongkongprotest	yes	hong kong	neutral	no
	#hypocrite	no			no
	#icymi	no			no
	#indonesia	no			no
	#live	no			no
	#mao	yes	chinese political affiliation	neutral	no
	#merkel	no			no
	#mideast	no			no
	#millennials	no			no
	#moron	no			no
	#muslims	No			no
	#n95	no			no
	#nasa	no			no
	#opec	no			no
	#ousttrudeaunow	no			no
	#pandumbic	no			yes	negative
	#pence	no			no
	#photography	no			no
	#podcast	no			no
	#rome	no			no
	#sandf	no			no
	#scientists	no			yes	neutral
	#security	no			no
	#shameonchina	yes	china	Very Negative	no
	#staystrong	no			no
	#totalitarianism	no			no
	#trumpistheworstpresidentever	no			no
	#tuesdayvibes	no			no
	#unhygienic	no			no
	#vitaminc	no			no
	#wednesdaythoughts	no			no
	#wutang	yes	wuhan	Neutral	no
	#yellowicon	no			no
	#2020election	no			no
	#animalcruelty	no			no
	#ayatollahsspreadcovid19	no			no
	#chinajoe	yes	china	neutral	no
	#chinaxivirus	yes	china	negative	yes	Neutral
	#climatecrisis	no			no
	#closetheschools	no			yes	negative
	#cnbc	no			no
	#communistvirus	yes	chinese political affiliation	negative	no	negative
	#conspiracytheories	no			no
	#coronarovirus	no			yes	neutral
	#coronavirius	no			yes	neutral
	#coronavirusireland	no			yes	neutral
	#coronavirusnews	no			yes	neutral
	#coronavirusnewyork	no			yes	neutral
	#coronaviruswashington	no			yes	neutral
	#covid19bangalore	no			yes	neutral
	#covid2019italia	no			yes	neutral
	#cpac2020	no			no
	#darktolight	no			no
	#decouplechina	yes	china	negative	no
	#drainthedeepstate	no			no
	#evil	no			no
	#finance	no			no
	#fmtnews	no			no
	#founders	no			no
	#freespeech	no			no
	#greece	No			no
	#guangdong	no			no
	#hunterbiden	no			no
	#hygiene	no			no
	#ilhanomar	no			no
	#illness	no			yes	neutral
	#indiafightscoronavirus	no			yes	negative
	#ingrahamangle	no			no
	#jimoneill	no			no
	#kaga2020	no			no
	#koronawirus	no			yes	negative
	#la	no			no
	#maga2020landslide	no			no
	#mandarin	yes	chinese dialect	Neutral	no
	#memes	no			no
	#occupiedtibet	yes	tibet	Negative	no
	#oott	no			no
	#panicbuyinguk	no			yes	negative
	#pmmodi	no			no
	#prepper	no			no
	#putin	no			no
	#realnews	no			no
	#robots	no			no
	#seattlecoronavirus	no			yes	negative
	#shameless	no			no
	#thegreatawakening	no			no
	#trumpviruscoverup	no			yes	Negative
	#tuckercarlsontonight	no			no
	#ukcoronavirus	no			yes	neutral
	#wuhanchinesevirus	yes	wuhan/china	negative	yes	neutral
	#wuhancoronav	yes	wuhan	Neutral	yes	neutral
	#wuhanviris	yes	wuhan	Neutral	yes	neutral
	#ww3	no			no
	#xrp	no			no
	#youtubers	no			no
	#2020	no			no
	#afghanistan	no			no
	#bioterrorism	no			yes	very negative
	#bloodycarrie	no			no
	#bri	yes	Chinese infrastructure	Neutral	no		Belt and road initiative
	#canadians	no			no
	#chinalife	yes	china	Neutral	no
	#chinesepropaganda	yes	china	Neutral	no
	#cinema	no			no
	#communistpartyofchina	yes	chinese political affiliation	neutral	no
	#coronavirusdiseaseuk	no			yes	neutral
	#coronavirusfrance	no			yes	neutral
	#coronoavirusoutbreak	no			yes	negative
	#cov19	no			yes	neutral
	#crookedhillary	no			no
	#cuomo	no			no
	#daegu	no			no
	#dem	no			no
	#demonrats	no			no
	#despicable	no			no
	#disney	no			no
	#donttrustchinachinaisasshole	yes	china	Very Negative	no
	#education	no			no
	#fake	no			no
	#flatteningthecurve	no			yes	Negative
	#freechina	yes	china	positive	no
	#hkhrda	yes	hong kong	Neutral	no
	#hongkongpolicebrutality	yes	hong kong police	negative	no
	#hope	no			no
	#indians	no			no
	#indiavscorona	no			yes	negative
	#lab	no			no
	#learnchinese	yes	china	neutral	no
	#leftist	no			no
	#liberalhypocrisy	no			no
	#liberalismisamentaldisease	no			no
	#mainlandchinese	yes	china	neutral	no
	#market	no			no
	#mikepence	no			no
	#mumbai	no			no
	#n95masks	no			yes	neutral
	#pangolin	yes	chinese cultural practice	Neutral	no
	#perspective	no			no
	#police	no			no
	#pollution	no			no
	#positive	no			no
	#pray	no			no
	#sarscov19	no			yes	neutral
	#silver	no			no
	#spx	no			no
	#spygate	no			no

## Sheet: Codings
	Very Positive
	Positive		yes
	Neutral		no
	Negative
	Very Negative
